# Supplementary material for: Analyses of Compact Trichinella Kinomes Reveal a MOS-Like Protein Kinase with a Unique N-Terminal Domain
Source: PubMed Central journal article supplement (PMC5015942; doi:10.1534/g3.116.032961), 2016-07-13
Supplement: supp_g3.116.032961_FigureS2.pdf [file supp_g3.116.032961_FigureS2.pdf]

## Supplementary File 2

### Analyses of Compact *Trichinella* Kinomes Reveal a MOS-like Protein Kinase with a Unique N-terminal Domain

Andreas J. Stroehlein\*, Neil D. Young\*, Pasi K. Korhonen\*, Bill C.H. Chang\*<sup>†</sup>, Paul W. Sternberg<sup>‡</sup>, Giuseppe La Rosa<sup>§</sup>, Edoardo Pozio<sup>§</sup> and Robin B. Gasser\*<sup>,1</sup>

\*Faculty of Veterinary and Agricultural Sciences, The University of Melbourne, Parkville, Victoria 3010, Australia

<sup>†</sup>Yourgene Bioscience, Shu-Lin District, New Taipei City 23863, Taiwan

<sup>‡</sup>Division of Biology, HHMI, California Institute of Technology, Pasadena, California 91125, USA

<sup>§</sup>Istituto Superiore di Sanità, 00161 Rome, Italy

**Figure S2** Clusters of orthologs among *Trichinella spiralis* (T1), *T. pseudospiralis* (T4.1), *Caenorhabditis elegans* (CEL) and *Homo sapiens* (HSA) based on orthoMCL clustering (E-value  $\leq 1e^{-5}$ ; similarity  $\geq 0.8$ ). Individual sequence identifiers are given in Tables S3-S10

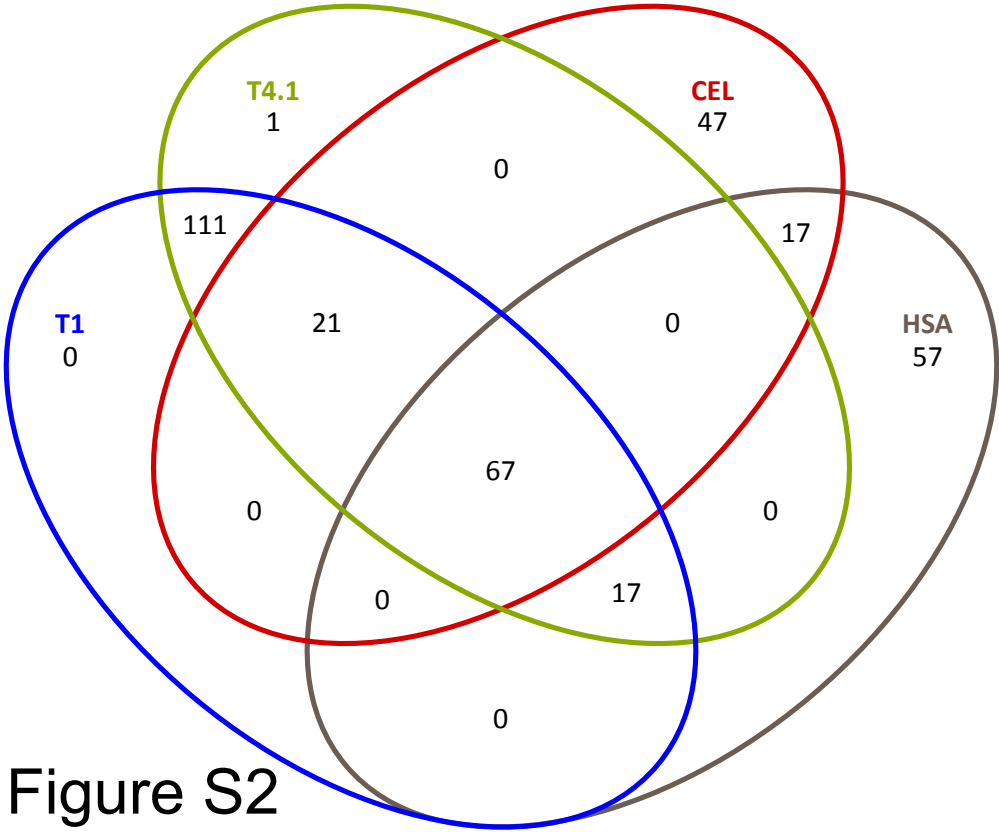

Figure S2
